# Supplementary material
Source: publisher figshare collection journal article supplement (https://tandf.figshare.com/ndownloader/files/17980166)
Supplement: Supplementary file 1 [file 17980166]

| Supplementary Table S1. Detailed search strategy | |
| --- | --- |
| Database | Search terms |
| PubMed | - (Physical Therapy Modalities **OR** physical therapy **OR** physiotherapy) **AND** (Ambulatory Care **OR** Primary Health Care **OR** Outpatients **OR** primary care **OR** ambulatory **OR** outpatient **OR** delivery of health care **OR** ambulatory care) **AND** (Referral and Consultation **OR** referral **OR** direct access **OR** triage **OR** direct access physical therapy **OR** self-referral **OR** professional competence **OR** gatekeeping **OR** extended scope of practice **OR** first line physiotherapy **OR** open access) **AND** (Musculoskeletal Diseases **OR** musculoskeletal disease **OR** musculoskeletal disorder **OR** musculoskeletal disorders **OR** Orthopedic disorder **OR** orthopedic disorders) |
| Web of Science | - (Physical Therapy Modalities **OR** physical therapy **OR** physiotherapy) **AND** (Ambulatory Care **OR** Primary Health Care **OR** Outpatients **OR** primary care **OR** ambulatory **OR** outpatient **OR** delivery of health care **OR** ambulatory care) **AND** (Referral and Consultation **OR** referral **OR** direct access **OR** triage **OR** direct access physical therapy **OR** self-referral **OR** professional competence **OR** gatekeeping **OR** extended scope of practice **OR** first line physiotherapy **OR** open access) **AND** (Musculoskeletal Diseases **OR** musculoskeletal disease **OR** musculoskeletal disorder **OR** musculoskeletal disorders **OR** Orthopedic disorder **OR** orthopedic disorders) |
| PEDro | - Physi* AND Health Care |
| Embase | - ('physical therapy modalities'/exp OR 'physical therapy modalities' OR (physical AND ('therapy'/exp OR therapy) AND modalities) OR 'physical therapy'/exp OR 'physical therapy' OR (physical AND ('therapy'/exp OR therapy)) OR 'physiotherapy'/exp OR physiotherapy) AND ('primary health care'/exp OR 'primary health care' OR (primary AND ('health'/exp OR health) AND ('care'/exp OR care)) OR 'outpatients'/exp OR outpatients OR 'primary care'/exp OR 'primary care' OR (primary AND ('care'/exp OR care)) OR ambulatory OR 'outpatient'/exp OR outpatient OR 'delivery of health care'/exp OR 'delivery of health care' OR (('delivery'/exp OR delivery) AND of AND ('health'/exp OR health) AND ('care'/exp OR care)) OR 'ambulatory care'/exp OR 'ambulatory care' OR (ambulatory AND ('care'/exp OR care))) AND (('referral'/exp OR referral) AND ('consultation'/exp OR consultation) OR 'referral'/exp OR referral OR 'direct access' OR (direct AND ('access'/exp OR access)) OR 'triage'/exp OR triage OR 'direct access physical therapy' OR (direct AND ('access'/exp OR access) AND physical AND ('therapy'/exp OR therapy)) OR 'self referral'/exp OR 'self referral' OR 'professional competence'/exp OR 'professional competence' OR (professional AND ('competence'/exp OR competence)) OR 'gatekeeping'/exp OR gatekeeping OR 'extended scope of practice' OR (extended AND ('scope'/exp OR scope) AND of AND ('practice'/exp OR practice)) OR 'first line physiotherapy' OR (first AND ('line'/exp OR line) AND ('physiotherapy'/exp OR physiotherapy)) OR 'open access' OR (open AND ('access'/exp OR access))) AND ('musculoskeletal diseases'/exp OR 'musculoskeletal diseases' OR (musculoskeletal AND ('diseases'/exp OR diseases)) OR 'musculoskeletal disease'/exp OR 'musculoskeletal disease' OR (musculoskeletal AND ('disease'/exp OR disease)) OR 'musculoskeletal disorder'/exp OR 'musculoskeletal disorder' OR (musculoskeletal AND ('disorder'/exp OR disorder)) OR 'musculoskeletal disorders'/exp OR 'musculoskeletal disorders' OR (musculoskeletal AND ('disorders'/exp OR disorders)) OR 'orthopedic disorder' OR (orthopedic AND ('disorder'/exp OR disorder)) OR 'orthopedic disorders' OR (orthopedic AND ('disorders'/exp OR disorders))) AND ([article]/lim OR [article in press]/lim) |
| CINAHL | - (Physical Therapy Modalities **OR** physical therapy **OR** physiotherapy) **AND** (Ambulatory Care **OR** Primary Health Care **OR** Outpatients **OR** primary care **OR** ambulatory **OR** outpatient **OR** delivery of health care **OR** ambulatory care) **AND** (Referral and Consultation **OR** referral **OR** direct access **OR** triage **OR** direct access physical therapy **OR** self-referral **OR** professional competence **OR** gatekeeping **OR** extended scope of practice **OR** first line physiotherapy **OR** open access) **AND** (Musculoskeletal Diseases **OR** musculoskeletal disease **OR** musculoskeletal disorder **OR** musculoskeletal disorders **OR** Orthopedic disorder **OR** orthopedic disorders) |
